# Supplementary material for: A Drosophila Insulin-like Peptide Promotes Growth during Nonfeeding States
Source: PubMed Central journal article supplement (PMC2806523; doi:10.1016/j.devcel.2009.10.009), 2009-12-15
Supplement: mmc1.pdf [file mmc1.pdf]

## Supplemental Data

A *Drosophila* Insulin-like Peptide Promotes

## Growth during Nonfeeding States

Maija Slaidina, Rénaud Delanoue, Sebastian Gronke, Linda Partridge, and Pierre Léopold

## Slaidina\_Supplemental Material

## Slaidina\_Supplemental Figure S1

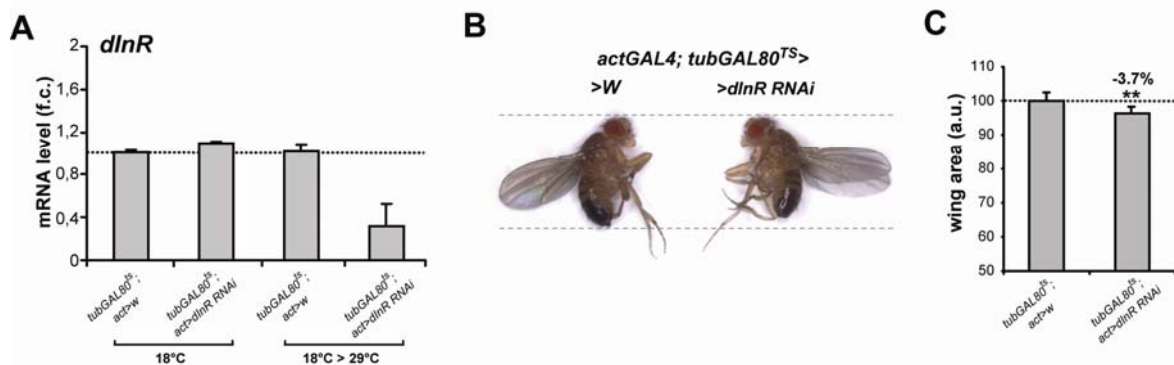

**Supplemental figure S1: Organismal growth requires insulin signalling during pupal stages.**

(A) Measurement of *dlnR* expression by qRT-PCR from *tubGal80<sup>ts</sup>; act>w* and *tubGal80<sup>ts</sup>; act>dlnR RNAi* pupae either kept at restrictive temperature (18°C) or transferred at 29°C at 120h AED to silence *dlnR* expression (18°C>29°C). RNA extracts were made 12h after the temperature shift. Fold changes are relative to *tub-Gal80<sup>ts</sup>; act>w* animals under the same temperature shift program. Error bars represent SD.

(B) *tubGal80<sup>ts</sup>; act>dlnR RNAi* flies are smaller than *tubGal80<sup>ts</sup>; act>w* when *dlnR* is silenced during pupal stages by temperature shift-up experiment at 120h AED.

(C) Wing area of *tubGal80<sup>ts</sup>; act>w* and *tubGal80<sup>ts</sup>; act>dlnR RNAi* under the same temperature shift programs.

# Slaidina\_Supplemental Figure S2

**A** 1st transcript  
 CGCGGATCCGAACACTGCGTTTGCTGGCTTTGATGAAACAGTGCACGTTTGCTTGTTGAGAGGAAAGGTT  
 GTGTGCGGACGAATTTTTTTTTGAAAACATTAACCCCTACGTGGAATAAAAAAATGAAATATTGCAAATTTT  
 GCTGCAAAGCTGTGACTGGAGTAAAATTAATTCACGTGCCGAAGTGTGCTATTAAGAGAAAATTGTGGGAG  
 CAGAGCCTTGGGTGCAGCCTTGGTGAAAACCTCCCAAATTTGTGATACCCACTTTAATGATTGCGCAGTGGAA  
 GGCTGCACCTGCAAAGGTCAGACATTTAAAGGAGGGCGACTCAACGCAGATGCCGTACCTAGTAAAGTG  
 ATAGAGCCTGAACCAGAAAAGATAAAAGAAGGCTATACCAGTGGGAGTACACAAACAGAATG

2nd transcript  
 ATCAAATAACCATATACAAGTGCAGGTGGTAGTGATGGAAGAAACATAGATGGGTTTGATTCAAGTGGCAGCC  
 CCGACACAAGCGTCGGGTTCCGGCAAATCACCAATAGATGGCGTGCATAGGCGCGAAATTTGTATTAATGC  
 CACTTTTGGTCGCTTGAAATGATACAAATAAATGAAACCATTATTATTATTTTAAACGATTCAACACGATCTTT  
 GAAATG

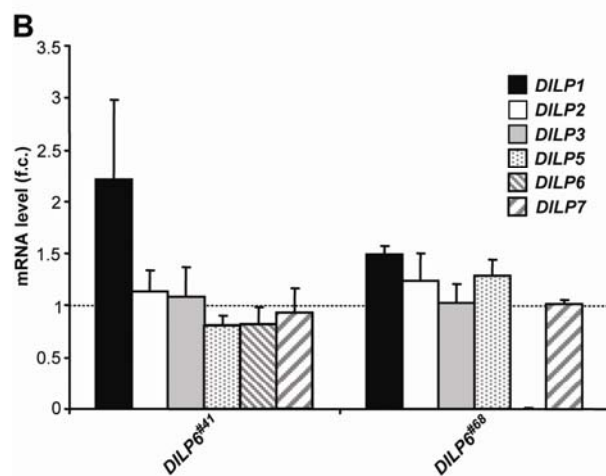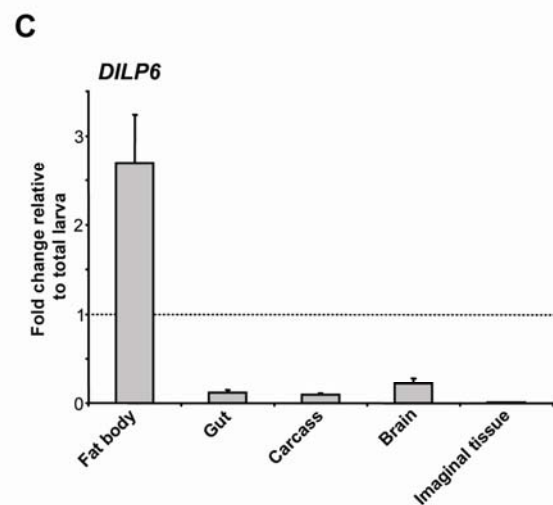

**Supplemental figure S2: *DILP6* expression is the highest in the fat body.**

(A) Sequence of the *DILP6*<sup>#41</sup> locus. 5'RACE experiments reveal 2 transcripts. The first transcript is a fusion between part of KG004792 P element (underlined italic) and *DILP6* exon2 (arrow). This transcript includes the full *DILP6* open reading frame (ORF) and an additional ORF encoding part of the transposase peptide (bold underlined italic). The second transcript shows a fusion between the adjacent genomic locus of the pole hole gene (*ph1*) (grey) and *DILP6* exon2, creating an additional upstream ORF (underline grey).

(B) Relative expression of *DILP* genes in *DILP6* mutants (*DILP6*<sup>#41</sup> and *DILP6*<sup>#68</sup>) at wandering stage compared to control. Error bars represent SD.

(C) Relative expression of *DILP6* in fat body, gut, carcass, brain and imaginal tissues at wandering stage (110h AED). Fold changes are relative to total larva RNA. Error bars represent SD

# Slaidina\_Supplemental Figure S3

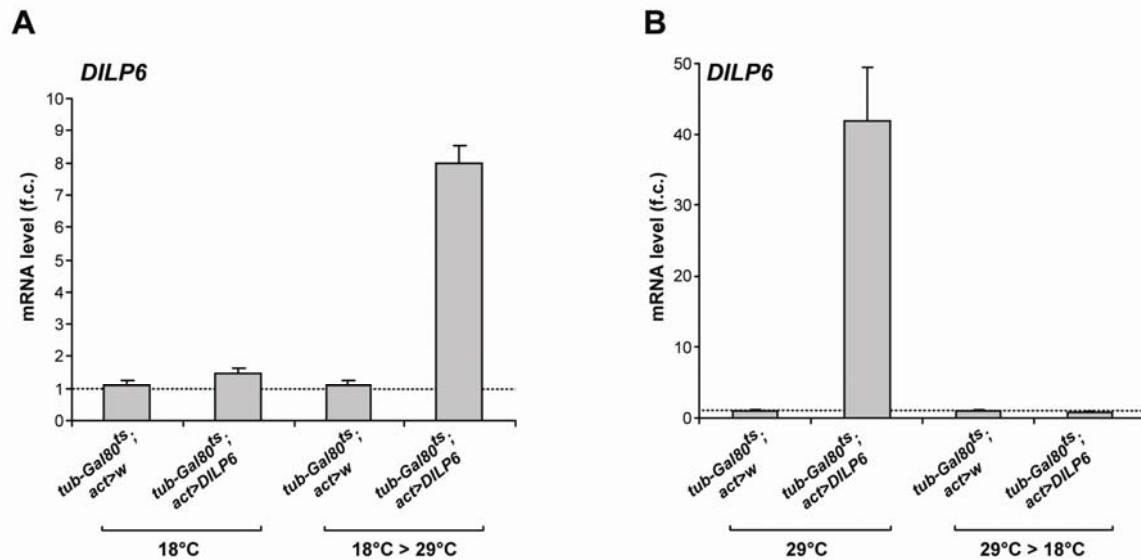

## Supplemental figure S3: DILP6 overexpression is accurately induced or repressed by temperature shift-up and shift-down programs.

(A) Measurement of *DILP6* expression by qRT-PCR from *tubGal80<sup>ts</sup>; act>w* and *tubGal80<sup>ts</sup>; act>DILP6* pupae either kept at restrictive temperature (18°C) or put at 29°C at 120h AED to drive *DILP6* overexpression (18°C>29°C). RNA extracts were made 12h after the temperature shift. Fold changes are relative to *tubGal80<sup>ts</sup>; act>w* animals under the same temperature shift program. Error bars represent SD.

(B) Measurement of *DILP6* expression by qRT-PCR from *tubGal80<sup>ts</sup>; act>w* and *tubGal80<sup>ts</sup>; act>DILP6* larvae either kept at non-restrictive temperature (29°C) or transferred at 18°C at 96h AED to block *DILP6* overexpression (29°C>18°C). RNA extracts were made 12h after the temperature shift-down. Fold changes are relative to *tubGal80<sup>ts</sup>; act>w* animals under the same temperature shift program. Error bars represent SD.

## SUPPLEMENTAL EXPERIMENTAL PROCEDURES

### 5'RACE

Total RNA was prepared from adult males of *DILP6<sup>#41</sup>* mutants, *DILP6<sup>#68</sup>* mutants and wild type controls. The 5'RACE was done using the FirstChoice® RLM-RACE Kit (Ambion) according to the instructions of the manufacturer. SOL8 was used in combination with the outer primer for the first round, SOL167 in combination with the inner primer in the second round of the nested PCR. PCR products were subcloned in pCRII-Topo vector (Invitrogen) and sequenced.

Nested PCR with primer combinations:

First round PCR:

- a. SOL8/outer primer
- b. SOL167/outer primer

Second Round PCR:

- a. SOL167/inner primer
- b. SOL165/inner primer

SOL8: GGGTGTGGCTGAGTGGTGG

SOL165: AGGGCCACCGTTCCGCTTAC

SOL167: CTTGCAGCACAAATCGGTTACG
